# Supplementary material for: Artificial intelligence guidance of advanced heart failure therapies: A systematic scoping review
Source: Front Cardiovasc Med. 2023 Feb 24;10:1127716. doi: 10.3389/fcvm.2023.1127716 (PMC9999024; doi:10.3389/fcvm.2023.1127716)
Supplement: Supplementary file 1 [file Table_1.XLSX]

## Sheet: Sheet1
	Year	Author	Application Domain	Data Modality	Patients	Features	ML Type	ML Model	Model Validation Method	Explainability Method
	2005	Hoda et al.	Post-transplant care	Structured data	101	65	Supervised	Evolutionary algorithm	Not reported	None
	2009	Oztekin	Predicting HTx outcomes	Structured data	16604	283	Supervised	Multilayer perceptron, Decision trees, Logistic regression	Cross-validation (10-fold)	Model feature importance
	2010	Delen et al.	HTx outcomes	Structured data	106398	372	Supervised, Unsupervised	Support vector machine, Multilayer perceptron, Decision trees, K-means	Cross-validation (10-fold)	None
	2015	Nilsson	Predicting HTx outcomes	Structured data	55956	43	Supervised	Cox regression, Multilayer perceptron	Cross-validation (5-fold)	Model feature importance
	2016	Kourou et al.	Predicting MCS outcomes	Structured data	71	48	Supervised	Naïve Bayes, Bayesian network, Boosted decision trees, Support vector machines, Multilayer perceptron, Random forest	Cross-validation (10-fold, Leave-one-out)	None
	2018	Aras et al.	Guiding MCS practice	Image	64	Not reported	Supervised	Convolutional neural network	Fixed dataset split	None
	2018	Chen et al.	Post-transplant care	Images	50	Not reported	Supervised	Convolutional neural network	Not reported	None
	2018	Medved et al.	Predicting HTx outcomes	Structured data	27705	32	Supervised	Multilayer perceptron	Not reported	None
	2019	Bellavia et al.	Predicting MCS outcomes	Time series, Structured data	56	Not reported	Supervised	Logistic regression, Support vector machine, NaÏve Bayes	Cross validation (leave-one-out)	Covariate significance
	2019	Miller et al.	Predicting HTx outcomes	Structured data	56477	Not reported	Supervised	Logistic regression, Linear regression, Multilayer perceptron, Naïve Bayes, Support vector machine, Random forest, XGBoost	Bootstrapping	None
	2020	Agasthi et al.	Predicting HTx outcomes	Structured data	15236	87	Supervised	Gradient-boosted machine (GBM)	Cross-validation (10-fold)	Model feature importance
	2020	Ayers et al.	Predicting MCS outcomes	Time series, Structured data	282	10	Supervised	Multilayer perceptron	Fixed dataset split	Model feature importance
	2020	Hsich et al.	Predicting HTx outcomes	Structured data	30606	92	Supervised	Random survival forest	Not reported	Model feature importance
	2021	Ayers et al.	HTx outcomes	Structured data	33657	47	Supervised	Multilayer perceptron, Logistic regression, Boosted decision trees, Random forest	Fixed dataset split	Model feature importance
	2021	Kilic et al.	Predicting MCS outcomes	Structured data	16120	Not reported	Supervised	Logistic regression, XGBoost	Fixed dataset split (25% testing set)	None
	2021	Kilic et al.	Predicting MCS outcomes	Structured data	568	Not reported	Unsupervised	Hierarchical clustering	Not reported	None
	2021	Maw et al.	Guiding MCS practice	TIme series	38	87	Supervised	Boosted decision trees, Slow feature analysis	Cross validation (leave-one-out)	None
	2021	Misumi et al.	Predicting MCS outcomes	Time series	13	Not reported	Supervised	Discriminant analysis, K-nearest neighor, Naïve Bayes, Random forest, Support vector machine, Decision trees	Cross validation (leave-one-out)	Model feature importance
	2021	Peyster	Post-transplant care	Images	2472	154	Supervised	Support vector machine	Fixed dataset split	None
	2021	Shad et al.	Predicting MCS outcomes	Images (Video)	723	Not reported	Supervised	Convolutional neural network	Fixed validation set	Saliency map
	2021	Woillard et al.	Post-transplant care	TIme series, Structured data	2835	Not reported	Supervised	XGBoost	Cross-validation (10-fold)	Model feature importance
	2021	Zhou et al.	Predicting HTx outcomes	Structured data	381	13	Supervised	Logistic regression, Support vector machine, Random forest, XGBoost, Boosted decision trees, Gradient boosting machine (GBM), Multilayer perceptron	Cross-validation (5-fold)	SHAP
	2022	Hendren et al.	Predicting MCS outcomes	Structured data	5999	18	Unsupervised	Gaussian mixture model	Not reported	None
	2022	Kainuma et al.	Predicting HTx outcomes	Structured data	1294	31	Supervised	Random survival forest	Not reported	Model feature importance
	2022	Lipkova et al.	Post-transplant care	Images	6894	Not reported	Supervised	Convolutional neural network	Fixed dataset split (20% testing set)	Attention
	2022	Mete et al.	Predicting HTx outcomes	Structured data	2525	39	Supervised	Random forest	Cross-validation (10-fold)	Model feature importance
	2022	Miller et al.	Predicting HTx outcomes	Structured data	67939	112	Supervised	XGBoost, Random forest, Logistic regression, Random survival forest, Survival gradient boosting, Cox regression	Cross-validation (10-fold)	Model feature importance
	2022	Piening et al.	Post-transplant care	Structured data	26	Not reported	Supervised	Random forest	Cross-validation (repeated)	None
	2022	Topkara et al.	Guiding MCS practice	Structured data	20270	28	Supervised	Logistic regression, Support vector machine, Boosted decision trees, Multilayer perceptron, and Random forest	Cross-validation (10-fold)	Model feature importance
	2022	Wang et al.	Predicting HTx outcomes	Structured data	365	84	Supervised	Logistic regression, Random forest, Naïve bayes, Support vector machine, XGBoost	Cross-validation (5-fold)	SHAP
	2022	Wei et al.	Post-transplant care	Structured data	217	89	Supervised	XGBoost	Cross-validation (5-fold)	None

## Sheet: Note
Note
1. Most of the image analysis used transfer learning
2. Four studies used ML output for downstream analysis
3. The interpretablity is remain under-explored.
4. only one study considered potential bias (e.g., involoving very severe patients) and conducted sensitivity bias
5. RNN and CNN are not well used in time series data. Feature extraction was done for time series data.
